# Supplementary material for: Tethered Magnets Are the Key to Magnetotaxis: Direct Observations of Magnetospirillum magneticum AMB-1 Show that MamK Distributes Magnetosome Organelles Equally to Daughter Cells
Source: PubMed Central journal article supplement (PMC5550748; doi:10.1128/mbio.00679-17), 2017-08-08
Supplement: mbo004173411sf1.pdf [file mbo004173411sf1.pdf]

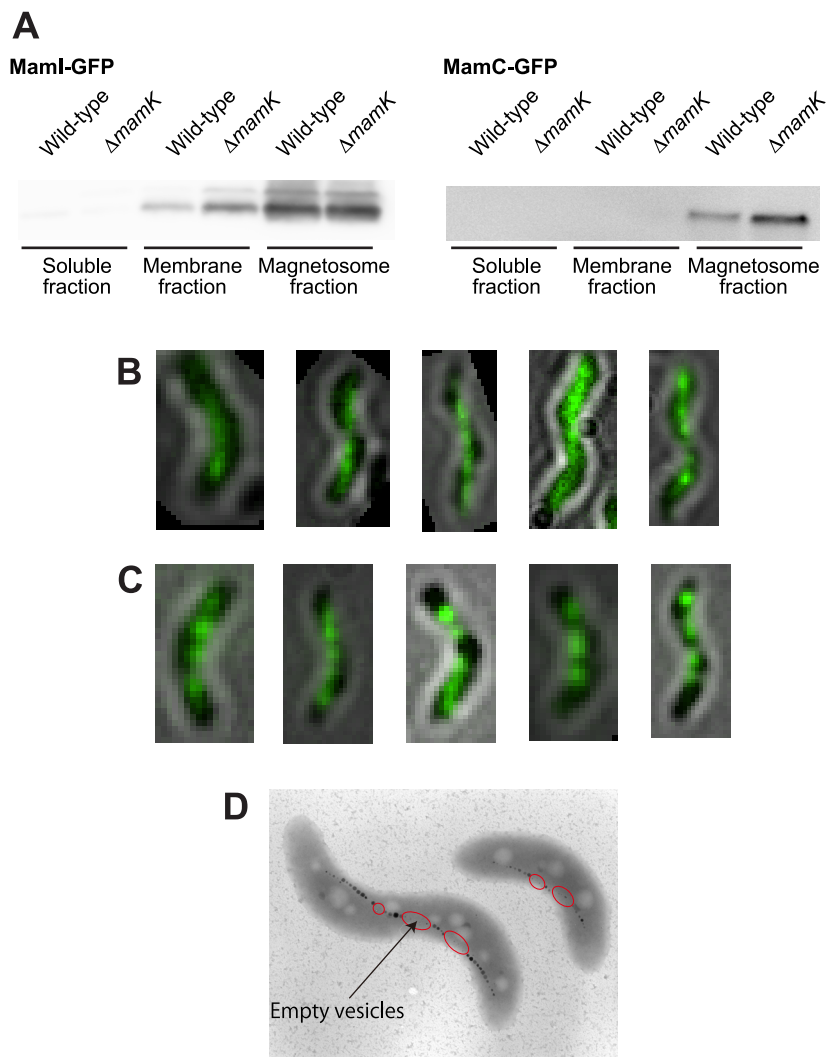

**E**

|                                                       | Subcellular fractions |          |             |
|-------------------------------------------------------|-----------------------|----------|-------------|
|                                                       | Soluble               | Membrane | Magnetosome |
| Ratio of immunoblotting band intensities <sup>a</sup> |                       |          |             |
| MamI-GFP (N = 4)                                      | 0.95                  | 13       | 100         |
| MamC-GFP (N = 5)                                      | 0.072                 | 0.38     | 100         |
| Protein contents <sup>b</sup>                         |                       |          |             |
|                                                       | 77%                   | 23%      | 0.1%        |
| Calculated GFP-labeled protein contents               |                       |          |             |
| MamI-GFP                                              | 19%                   | 78%      | 3%          |
| MamC-GFP                                              | 23%                   | 36%      | 41%         |

<sup>a</sup> Means of band intensities in magnetosome fractions were set as 100.

<sup>b</sup> Percentage of total amount of cellular protein.

FIG S1 (A) Localizations of MamI-GFP and MamC-GFP in wild-type and  $\Delta mamK$  *M. magneticum* AMB-1. Immunoblotting with anti-GFP antibody of proteins (10  $\mu\text{g}/\text{lane}$ ) extracted from the soluble, membrane, and magnetosome fractions. Both GFP-fused MamI and MamC were predominantly located in the magnetosome fractions. (B and C) Subcellular localizations of MamI-GFP and MamC-GFP. Merged GFP and bright field images of (B) MamI-GFP and (C) MamC-GFP expressed cells. (D) Transmission electron microscope image of *M. magneticum* AMB-1. The red circles show the positions of empty vesicles. (E) Summary table of MamI-GFP and MamC-GFP localizations estimated from the immunoblotting. Band intensities were measured in immunoblots of the soluble, membrane, and magnetosome fractions (5  $\mu\text{g}$  protein/lane) prepared from wild-type cells. Contents of MamI-GFP and MamC-GFP in each fraction were calculated using the ratio of immunoblotting band intensities and the percentages of protein contents of each subcellular fraction.
