# Supplementary material for: Tethered Magnets Are the Key to Magnetotaxis: Direct Observations of Magnetospirillum magneticum AMB-1 Show that MamK Distributes Magnetosome Organelles Equally to Daughter Cells
Source: PubMed Central journal article supplement (PMC5550748; doi:10.1128/mbio.00679-17), 2017-08-08
Supplement: mbo004173411sf2.pdf [file mbo004173411sf2.pdf]

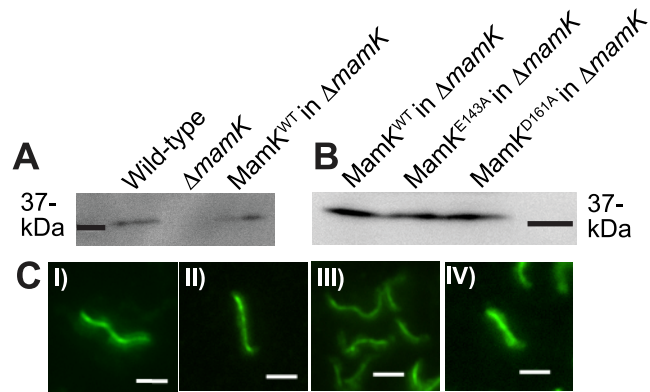

FIG S2 Expression of MamK<sup>WT</sup>, MamK<sup>E143A</sup> and MamK<sup>D161A</sup> in  $\Delta mamK$  cells. (A) Immunoblotting with anti-MamK antibody of cell free extracts (10  $\mu$ g protein/lane) from wild-type,  $\Delta mamK$ , and the MamK-complemented strains. The MamK content of the complemented strain was similar to that of the wild-type strain. (B) Immunoblotting with the anti-MamK antibody of cell free extracts (10  $\mu$ g protein/lane) from the MamK-complement strain, and MamK<sup>E143A</sup> and MamK<sup>D161A</sup> expressed  $\Delta mamK$  cells. (C) Immunofluorescence images of I) wild-type, II) MamK-complement strain, III) MamK<sup>E143A</sup> and IV) MamK<sup>D161A</sup> expressed  $\Delta mamK$  cells with the anti-MamK antibody. The MamK ATPase mutants, MamK<sup>E143A</sup> and MamK<sup>D161A</sup>, showed linear filamentous localizations similarly to MamK<sup>WT</sup>.
